# Supplementary material for: A highly stable 8-hydroxyquinolinate-based metal–organic framework as a selective fluorescence sensor for Fe3+, Cr2O72− and nitroaromatic explosives
Source: Royal Society of Chemistry journal article supplement (doi:10.1039/d0qi01032d), 2020-01-01

## Electronic Supplementary Information (ESI)

### Highly stable 8-hydroxyquinolate-based metal-organic framework as a selective fluorescence sensor for Fe<sup>3+</sup>, Cr<sub>2</sub>O<sub>7</sub><sup>2-</sup> and nitroaromatic explosives

Quan Sun,<sup>†</sup> Kun Yang,<sup>†</sup> Wenna Ma, Liyan Zhang and Guozan Yuan\*

*School of Chemistry and Chemical Engineering, Institute of Materials Science and Engineering,  
Anhui University of Technology, Maanshan, 243032, China.*

*Corresponding Author E-mail: guozan@ahut.edu.cn*

<sup>†</sup>These authors contributed equally to this work.

### Table of Contents

- Table S1.** Crystal data and structure refinement for complex **1**.  
**Table S2.** Selected bond lengths [Å] and angles [°] for **1**.  
**Fig. S1** <sup>1</sup>H and <sup>13</sup>C NMR spectroscopy of H<sub>2</sub>L.  
**Fig. S2** HR-MS spectrum of H<sub>2</sub>L.  
**Fig. S3-8** Views of the crystal structures of complex **1**.  
**Fig. S9** FTIR spectra of complex **1**.  
**Fig. S10** TGA curve for complex **1**.  
**Fig. S11** Fluorescence spectra of free ligand H<sub>2</sub>L and complex **1** in the solid state.  
**Fig. S12** Fluorescence intensities of **1** soaked in the M(NO<sub>3</sub>)<sub>x</sub> or FeSO<sub>4</sub> aqueous solutions.  
**Fig. S13** Fluorescence spectra and intensity of suspension of **1** upon addition of different Ln<sup>3+</sup>.  
**Fig. S14** The results of anti-interference experiments in fluorescence sensing Fe<sup>3+</sup> process.  
**Fig. S15** The Quenching efficiency and recyclability of **1** in fluorescence sensing Fe<sup>3+</sup> process.  
**Fig. S16** The UV-vis absorption spectra of aqueous solutions containing various metal ions and Fe<sup>3+</sup> with a gradual increase in concentration.  
**Fig. S17** Fluorescence spectra of **1** immersed in aqueous solution of different anions (1.0 mM).  
**Fig. S18** Fluorescence spectra and intensity of suspension of **1** immersed in different organic solvents.  
**Fig. S19** PXRD patterns of simulated, as-synthesized, and recovered **1** after five cycles for NACs sensing.  
**Fig. S20** The recyclability investigation of **1** for sensing NACs.

**Table S1.** Crystal data and structure refinement for complex **1**.

| Complex                                                                     | <b>1</b>                                           |
|-----------------------------------------------------------------------------|----------------------------------------------------|
| Formula                                                                     | C <sub>26</sub> H <sub>25</sub> NO <sub>8</sub> Zn |
| <i>F</i> <sub>w</sub>                                                       | 543.09                                             |
| cryst syst                                                                  | Tetragonal                                         |
| space group                                                                 | <i>P4</i> <sub>3</sub>                             |
| <i>a</i> (Å)                                                                | 16.3284(10)                                        |
| <i>b</i> (Å)                                                                | 16.3284(10)                                        |
| <i>c</i> (Å)                                                                | 10.9888(10)                                        |
| <i>α</i> (deg)                                                              | 90                                                 |
| <i>β</i> (deg)                                                              | 90                                                 |
| <i>γ</i> (deg)                                                              | 90                                                 |
| <i>V</i> (Å <sup>3</sup> )                                                  | 2160.1(2)                                          |
| <i>Z</i>                                                                    | 4                                                  |
| <i>D</i> <sub>c</sub> (g.cm <sup>-3</sup> )                                 | 1.210                                              |
| <i>F</i> (000)                                                              | 1084                                               |
| <i>μ</i> (mm <sup>-1</sup> )                                                | 1.535                                              |
| <i>T</i> (K)                                                                | 173                                                |
| reflns/unique                                                               | 40497/5570                                         |
| <i>R</i> <sub>int</sub>                                                     | 0.0540                                             |
| data/restraints/params                                                      | 5570/3/300                                         |
| GOF on <i>F</i> <sup>2</sup>                                                | 1.100                                              |
| <i>R</i> <sub>1</sub> , <i>wR</i> <sub>2</sub> ( <i>I</i> > 2σ( <i>I</i> )) | 0.0735, 0.1980                                     |
| <i>R</i> <sub>1</sub> , <i>wR</i> <sub>2</sub> (all data)                   | 0.0753, 0.2013                                     |
| largest diff. peak and hole (e.Å <sup>-3</sup> )                            | 1.013, -0.765                                      |

**Table S2.** Selected bond lengths [Å] and angles [°] for **1**.

|                   |          |                     |          |
|-------------------|----------|---------------------|----------|
| Zn(1)-O(1)        | 2.231(9) | N(1)-Zn(1)-O(2)#1   | 136.7(3) |
| Zn(1)-N(1)        | 2.297(8) | N(1)-Zn(1)-O(4)#2   | 127.2(3) |
| Zn(1)-O(2)#1      | 2.473(8) | N(1)-Zn(1)-O(5)#2   | 91.7(3)  |
| Zn(1)-O(3)#1      | 2.258(8) | O(3)#1-Zn(1)-N(1)   | 112.4(3) |
| Zn(1)-O(4)#2      | 2.321(7) | O(3)#1-Zn(1)-O(2)#1 | 56.1(3)  |
| Zn(1)-O(5)#2      | 2.349(8) | O(3)#1-Zn(1)-O(4)#2 | 110.7(3) |
| O(1)-Zn(1)-N(1)   | 74.3(3)  | O(3)#1-Zn(1)-O(5)#2 | 95.0(3)  |
| O(1)-Zn(1)-O(2)#1 | 88.6(3)  | O(4)#2-Zn(1)-O(2)#1 | 92.9(3)  |
| O(1)-Zn(1)-O(3)#1 | 136.3(3) | O(4)#2-Zn(1)-O(5)#2 | 55.5(3)  |
| O(1)-Zn(1)-O(4)#2 | 94.4(3)  | O(5)#2-Zn(1)-O(2)#1 | 128.5(3) |
| O(1)-Zn(1)-O(5)#2 | 128.6(3) | C(7)-O(1)-Zn(1)     | 114.9(7) |

Symmetry transformations used to generate equivalent atoms:

#1 -y+1, x+1, z+3/4    #2 -y+1, x, z+3/4

**Fig. S1** (a)  $^1\text{H}$  and (b)  $^{13}\text{C}$  NMR spectra of  $\text{H}_2\text{L}$  (The peaks at 3.36 in  $^1\text{H}$  NMR and 66.8 in  $^{13}\text{C}$  NMR can be easily assigned to the signals of 1,4-dioxane).

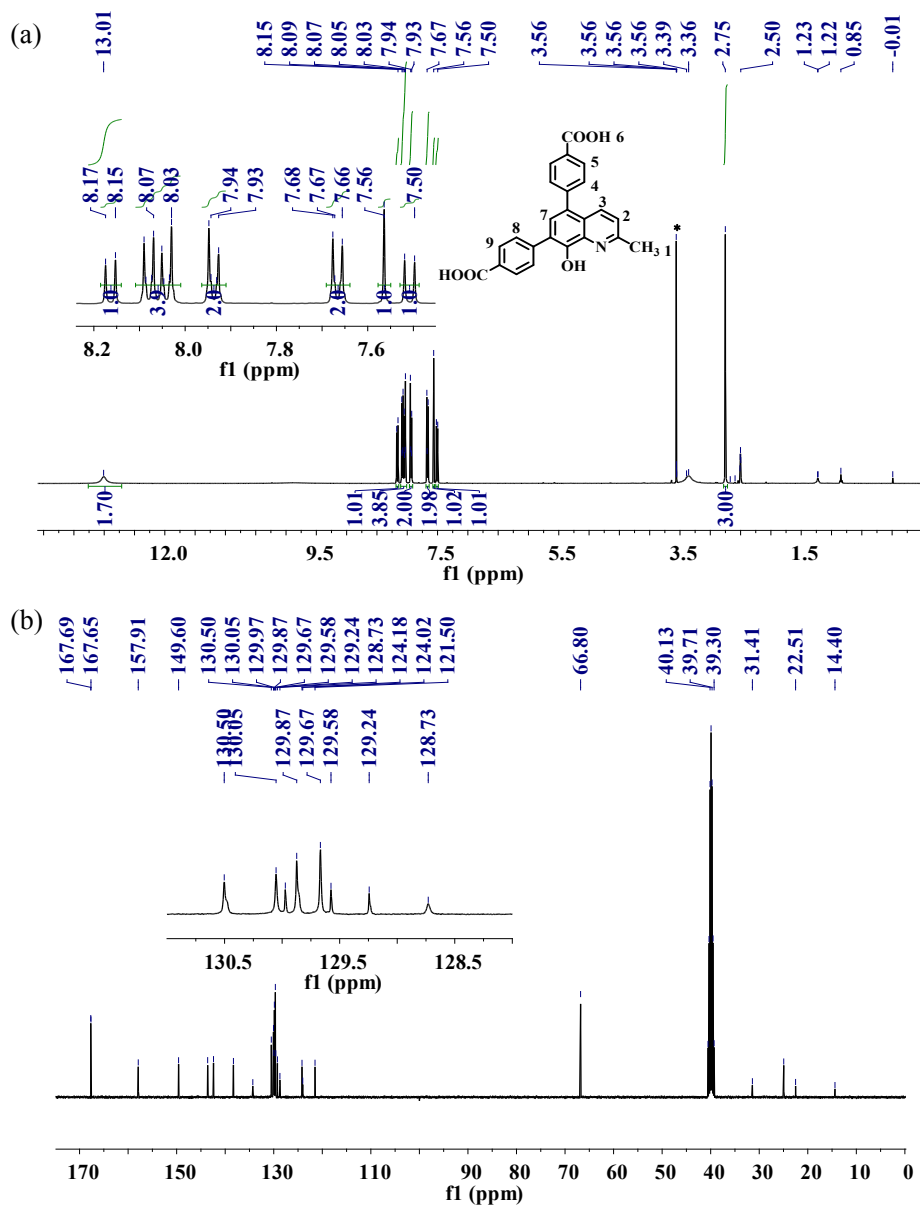

**Fig. S2** HR-MS spectroscopy of  $\text{H}_2\text{L}$ .

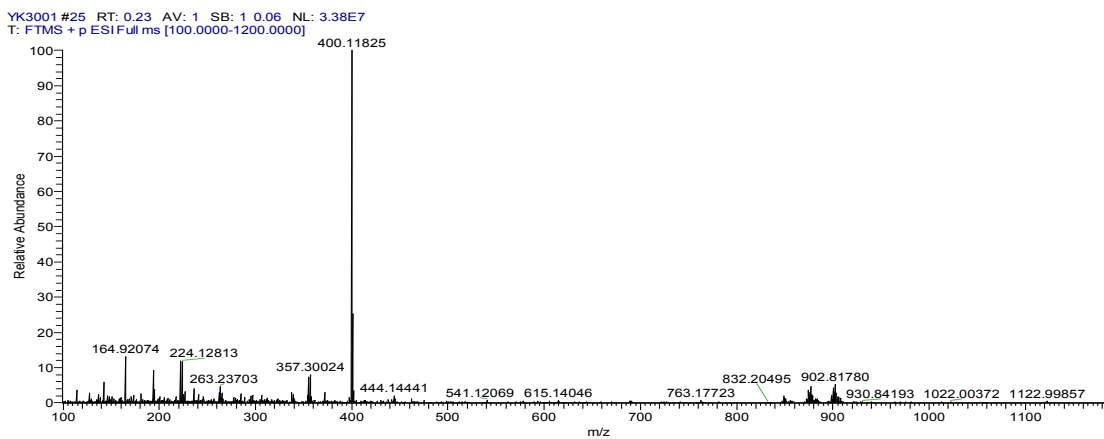

Fig. S3 View of the asymmetric unit of **1**.

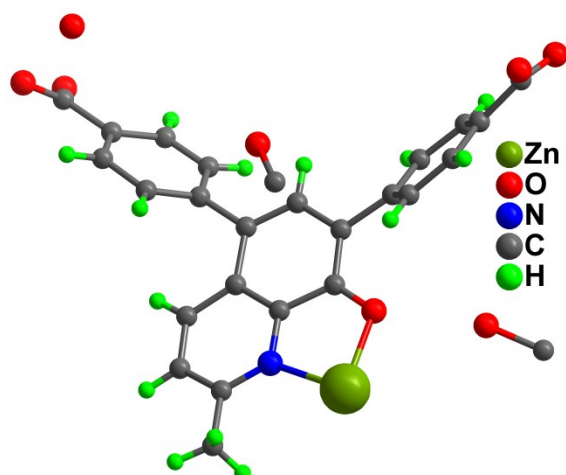

Fig. S4 The space-filling mode of a large cage in **1** fabricated by nine Zn(II) atoms and nine L.

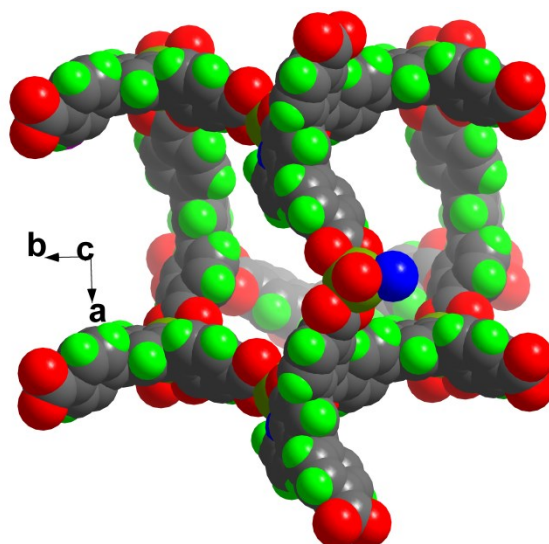

Fig. S5 A right-handed  $4_3$  helix in **1** with a pitch of 32.966(3) Å.

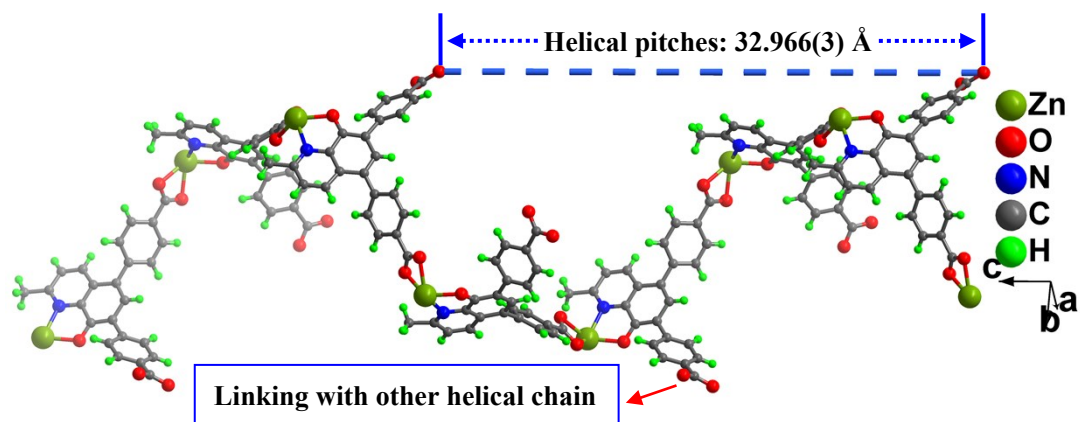

**Fig. S6** Three infinite four-fold helical chains in **1** are arranged in parallel.

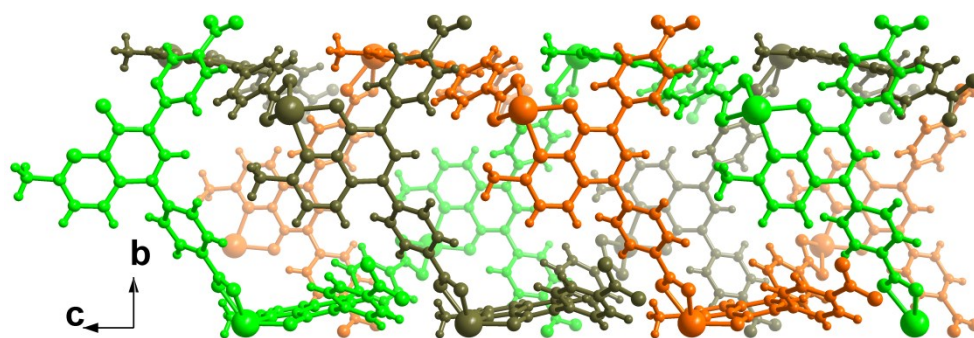

**Fig. S7** Porous framework **1** possesses two different 1D channels.

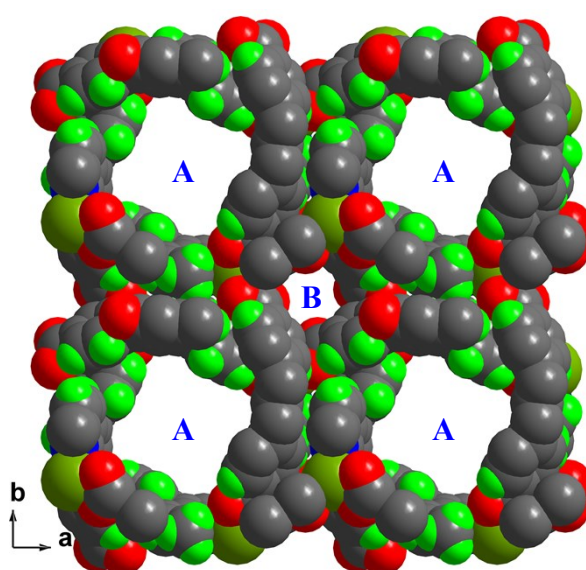

**Fig. S8** The channels in **1** are occupied by guest MeOH and H<sub>2</sub>O molecules.

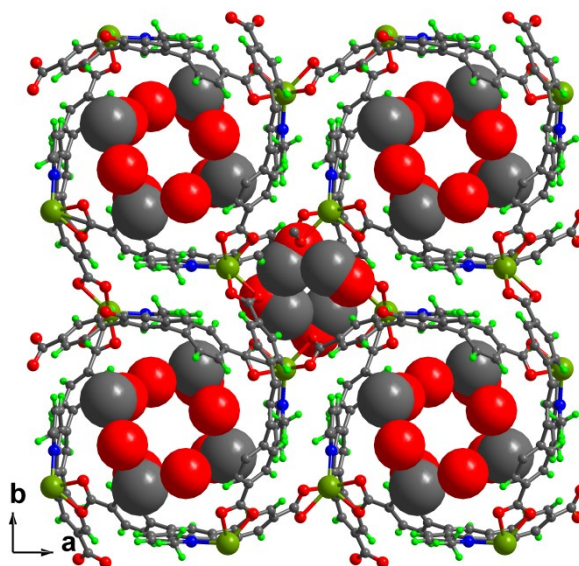

**Fig. S9** FTIR spectrum of complex **1**.

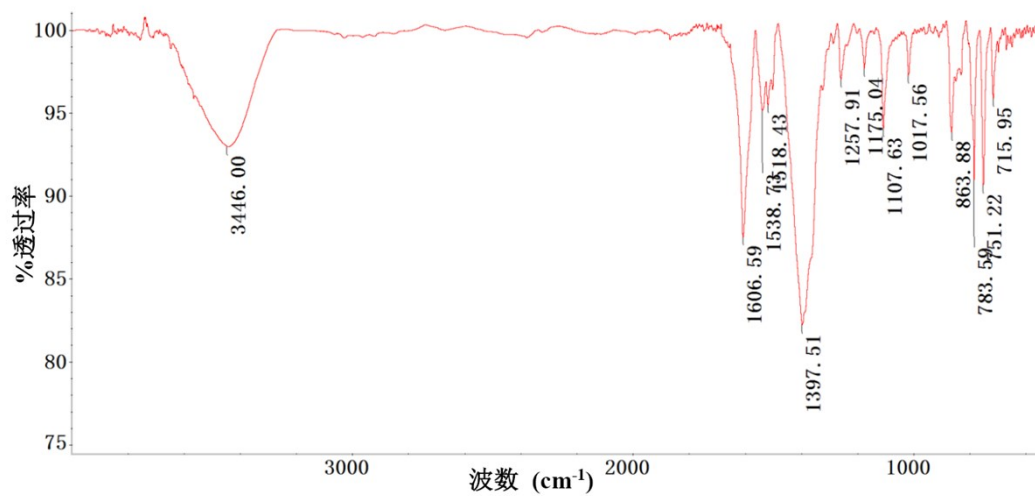

**Fig. S10** TGA curve for complex **1**.

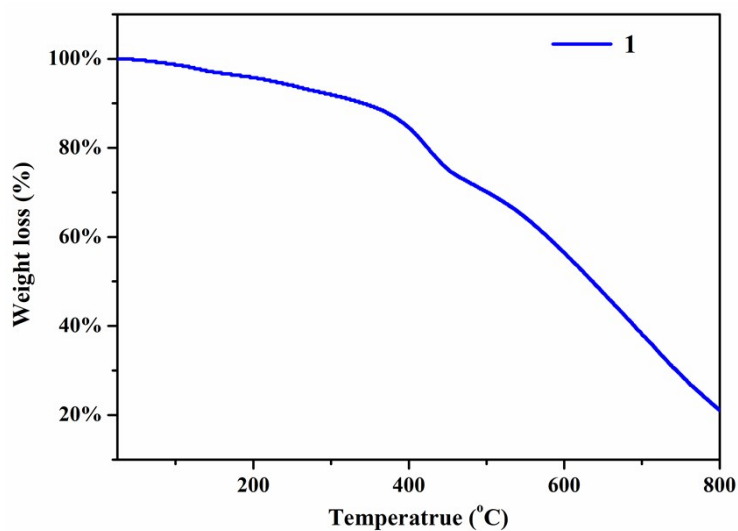

**Fig. S11** Fluorescence spectra of free ligand  $\text{H}_2\text{L}$  and complex **1** in the solid state ( $\lambda_{\text{ex}} = 350 \text{ nm}$ ).

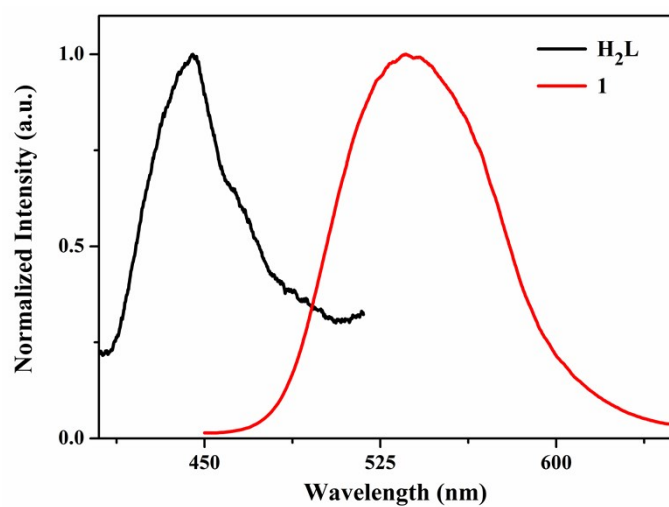

**Fig. S12** Fluorescence intensities of **1** soaked in the  $M(\text{NO}_3)_x$  or  $\text{FeSO}_4$  aqueous solutions.

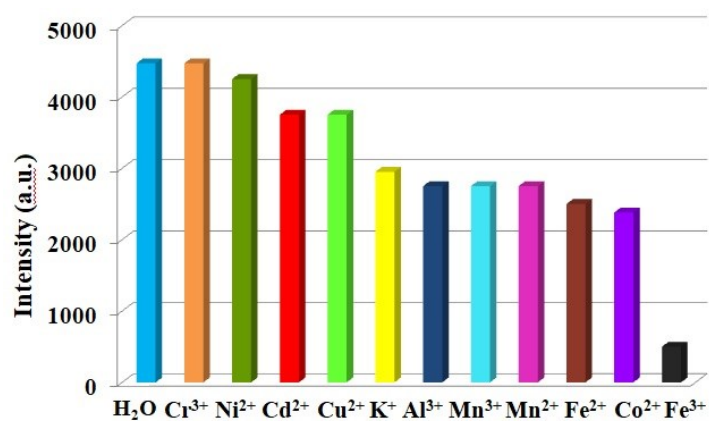

**Fig. S13** Upon addition of different  $\text{Ln}^{3+}$  cations, fluorescence spectra (a) and intensity (b) of suspension of **1** ( $\lambda_{\text{ex}} = 350 \text{ nm}$ ).

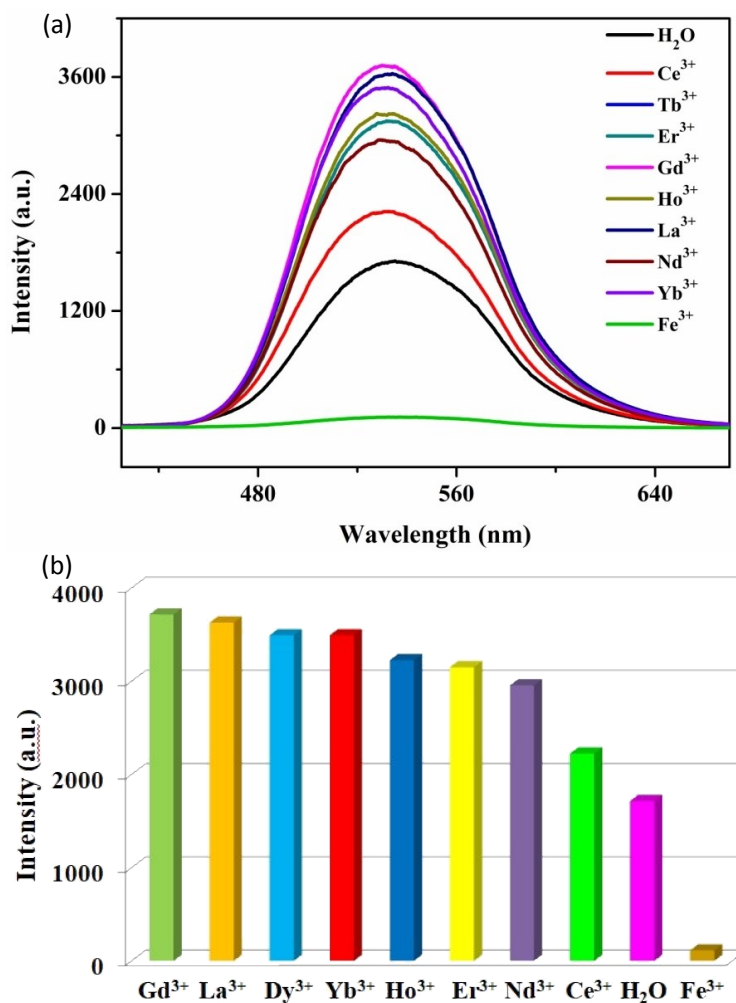

**Fig. S14** Fluorescence intensities of **1** immersed in the individual aqueous solutions of  $\text{Ln}(\text{NO}_3)_3$  (1 mM; red color) and mixed metal ions including  $\text{Fe}^{3+}$  ion (1 mM; blue color) under an excitation of 350 nm.

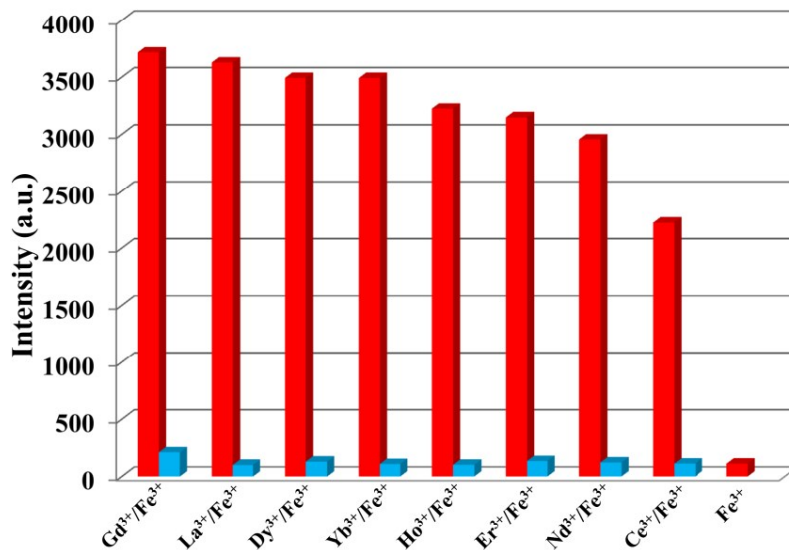

**Fig. S15** (a) Quenching efficiency (%) of **1** with different concentrations of  $\text{Fe}(\text{NO}_3)_3$  based on the equation: Quenching efficiency (%) =  $(I_0 - I)/I_0 \times 100\%$ ; (b) The recyclability test for sensing  $\text{Fe}^{3+}$ . Emission intensity of **1**, Fe@**1**, @**1**, 2nd, 5th.

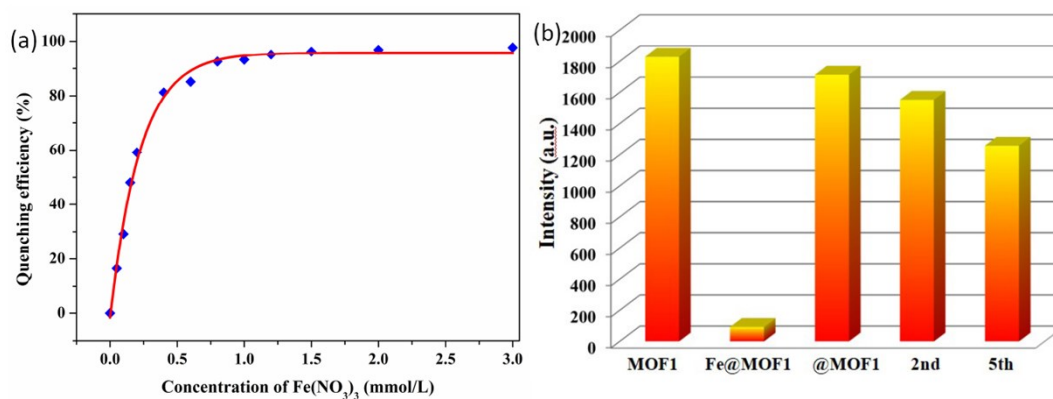

The recyclability test: Emission intensity of **1**, Fe@**1**, @**1**, 2nd, 5th. (Noting: Fe@**1** sample dispersed in an iron nitrate solution sonicated for 30 minutes; @**1** is supersonic ultrasound, centrifuged and washed with distilled water until the solution is colorless; 2nd is the repeat experiment with the same batch of samples at second times; 5th is the fifth repeated test with the same sample.



**Fig. S16** The UV-vis absorption spectra of aqueous solutions containing various metal ions ( $M(NO_3)_x$  or  $FeSO_4$ ) with the same volume of  $1 \text{ mmol}\cdot\text{L}^{-1}$ , the excitation spectrum and the absorption spectra of **1** (2 mg) dispersed in water (2 mL); (b) The UV-vis absorption spectra of  $Fe^{3+}$  with increasing concentrations.

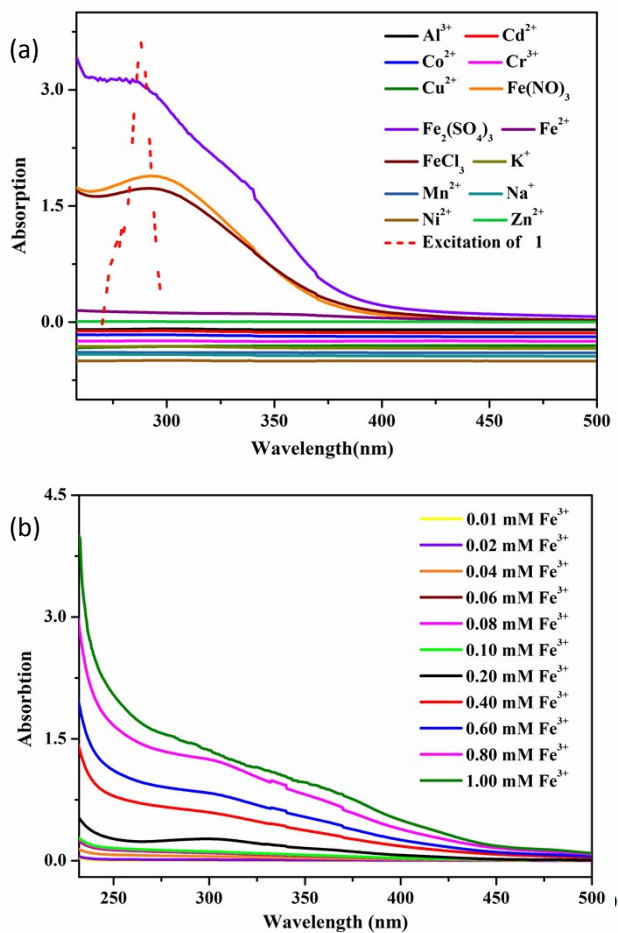

**Fig. S17** Fluorescence spectra of **1** immersed in aqueous solution of different anions (1.0 mM),  $\lambda_{ex} = 350 \text{ nm}$ .

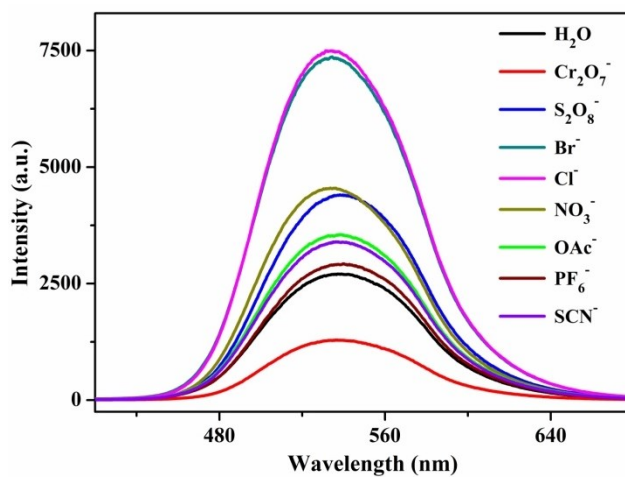

**Fig. S18** Fluorescence spectra (a) and intensity (b) of suspension of **1** immersed in different organic solvents ( $\lambda_{\text{ex}} = 350 \text{ nm}$ ).

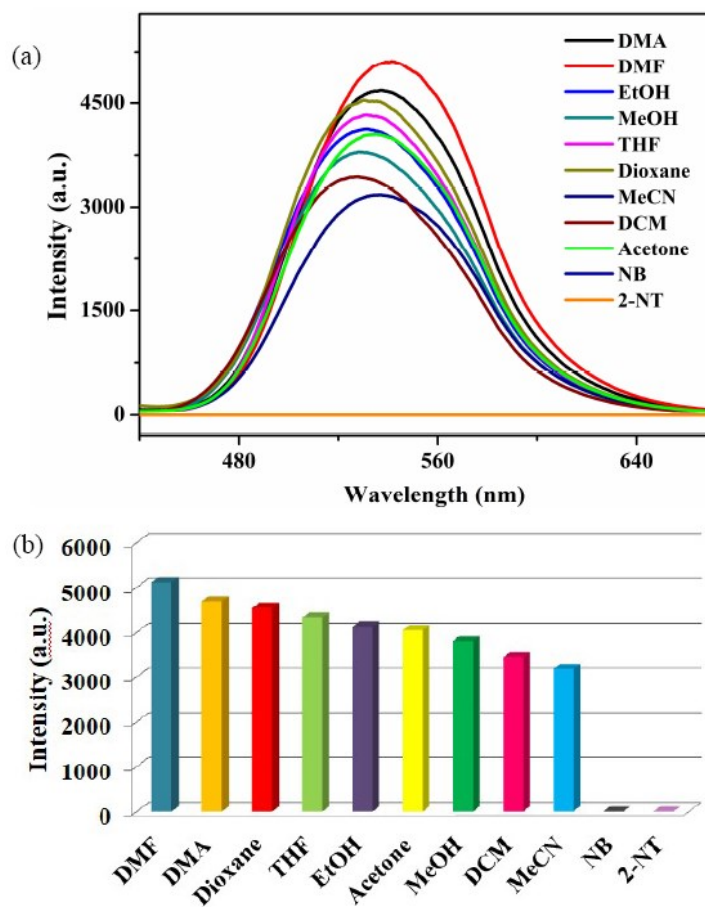

**Fig. S19** PXRD patterns of simulated, as-synthesized, and recovered **1** after five cycles for NACs sensing.

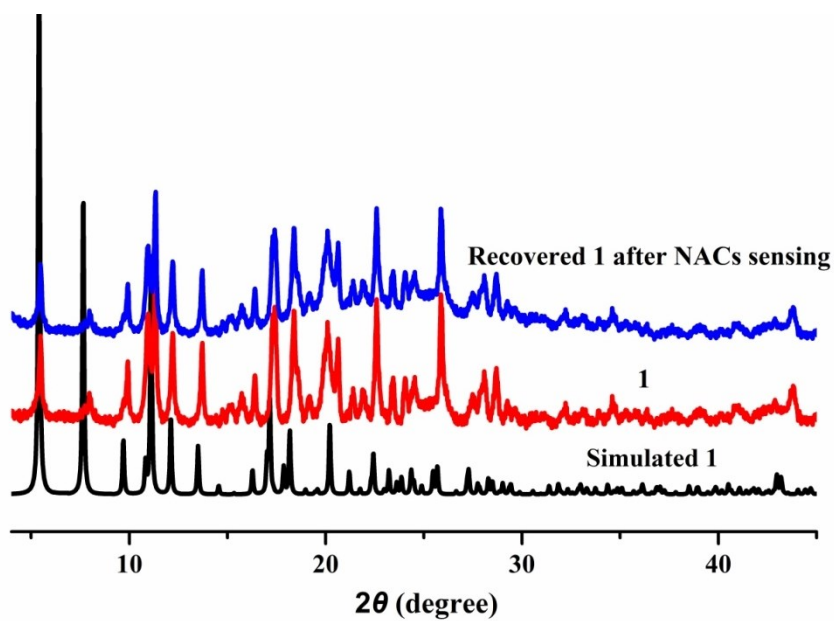

**Fig. S20** The recyclability investigation of **1** for sensing NACs (a: NB; b: 2-NT; c: TNT; d: TNP).

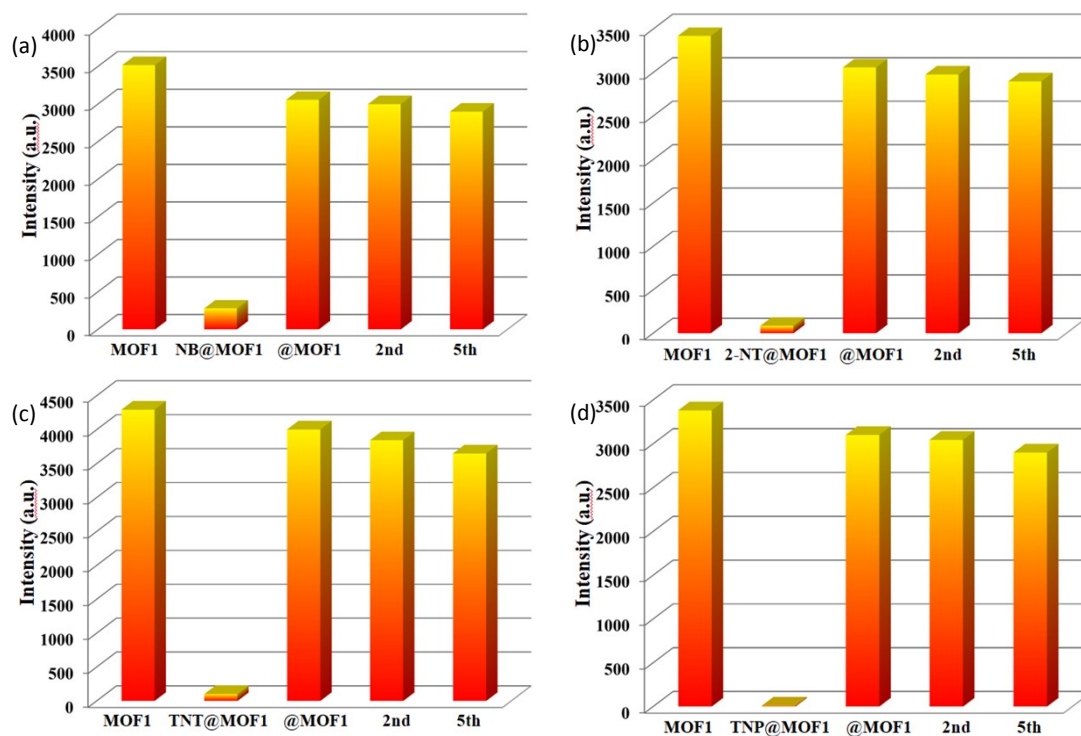

Supplement: d0qi01032d1.pdf [file d0qi01032d1.pdf]
